# Supplementary material
Source: PubMed Central journal article supplement (PMC2861863)
Supplement: NIHMS197057-supplement-supplement_1.pdf [file NIHMS197057-supplement-supplement_1.pdf]

## Supplemental Data:

### "Nitric Oxide Synthase is not essential for *Drosophila* development"

Nikita Yakubovich, Elizabeth A. Silva and Patrick H. O'Farrell

#### Supplemental Experimental procedures

##### Strains

*PBac{WH}Nos<sup>f02469</sup>* and *PBac{RB}Nos<sup>e02671</sup>* were obtained from the Exelixis Collection at the Harvard Medical School. *Nos<sup>C</sup>* was kindly provided by G. Enikolopov. To generate the *Nos<sup>A15</sup>* deletion, *hs-Flp; PBac{WH}Nos<sup>f02469</sup>/PBac{RB}Nos<sup>e02671</sup>* were heat-shocked and crossed to a balancer stock; progeny that were homozygous for candidate recombinant chromosomes were screened by PCR. Flies carrying the deletion were then out-crossed to *w<sup>1118</sup>* for at least five generations.

To remove the lethality associated with *Nos<sup>C</sup>*, *Nos<sup>C</sup>/PBac{WH}Nos<sup>f02469</sup>* females were crossed to *Nos<sup>C</sup>/CyO* males and viable, non-CyO progeny were screened for lack of the *white* transgene associated with *PBac{WH}Nos<sup>f02469</sup>*. Out of ~7500 progeny screened, we isolated three lines carrying candidate recombinant chromosomes (recombination frequency = [(3 X 2) / 7500] X 100 = 0.08%). The physical distance was calculated using an estimated recombination frequency of 3.6 m.u. (map units) per Mb for this region [S1]: 0.08 m.u./3.6 m.u. per Mb = 0.022Mb. Candidates were tested for retention of the glycine to glutamic acid substitution by sequencing.

##### PCR and rtPCR

PCR of recombinants was performed with the following primers:

PCR A\_forward: ATTTGAGAACCTGCGATTCGTG

PCR A\_reverse: TGCCCTCGATGTTCTTCAGTCTC

PCR B\_forward: TTCTGATTTTGAAGGCATAGTTTTC

PCR B\_reverse: GCAGTTAGAGGTTAGACAAGTGCTC

control\_forward: TGTTGTGCAGGAACTAAACAATG

control\_reverse: GATTGGGACCCGTTACTTAAATC

RNA for rtPCR was extracted from *w<sup>1118</sup>* and *Nos<sup>A15</sup>* using TRIzol Reagent (Invitrogen, cat: 15596-018) according the manufacturer's instructions and cDNA was generated using Superscript reverse transcriptase II (Invitrogen, cat: 18064-014). Primers used for the subsequent PCR are as follows:

Exon 2\_forward: GATGTCGCAGCATTTCACATCGATATT

Exon 5\_reverse: GTTCCATCGCGTCTCGTGGGC

Exon 5\_forward: GGCTCGTCAAAGTCCTTCATGAAG

Exon 8\_reverse: CAAAGTAGTCCGGATCGTGAC

Exon 8\_forward: GTCACGATCCGGACTACTTTG

Exon 9\_reverse: CATCGAACAGCATACTGGATAC

Exon 15\_forward: GGCTCGTCAAAGTCCTTCATGAAG

Exon 18\_reverse: CCGCAGTGTTAGCAAAAATGTC

### **NOS activity assays and western blotting**

NOS activity was measured using L-[2,3,4,5-<sup>3</sup>H]Arginine (GE Healthcare, cat: TRK698) and the NOS Activity Assay Kit (Cayman Chemical Company, cat: 781001) according to the manufacturer's instructions with the following modifications: 40 heads of each genotype were homogenized in 50uL buffer using a Teflon pestle. An aliquot of extract was reserved for western analysis, and 10uL of extract was incubated with 40uL reaction mix for 4 hours at 29C. 7mM L-valine was added to the reaction mix to inhibit potential arginase activity, which would interfere with the analysis; L-NNA was used to inhibit NOS activity in extracts from *w<sup>1118</sup>*. 3uL of each reaction was subjected to thin layer chromatography to separate arginine (R<sub>f</sub> of approximately 0.4) from citrulline (R<sub>f</sub> of approximately 0.9) using solvent consisting of chloroform, methanol, ammonium hydroxide and water (1:9:4:2). [<sup>3</sup>H] decay was measured by liquid scintillation. NOS activity is represented by cpm at the citrulline spot as a percent of the total cpm recovered (citrulline plus arginine). Significance was determined by the Students' T-test. Rabbit anti-NOS antibody was raised against a peptide corresponding to the entirety of exon 16, which is in the C-terminal reductase domain, fused to a 6X-Histidine tag. Antibodies were used under the following conditions: Rabbit anti-NOS (1/400), mouse anti-β-tubulin (1/10000, Molecular probes), HRP anti-rabbit and HRP anti-mouse (1/5000, Jackson Laboratories).

### **Diaphorase activity staining**

Diaphorase staining was performed essentially as in [S2]. In short, larvae were dissected in 4% formaldehyde and fixed in 4% formaldehyde in PBS with 0.2% Triton x-100 over night. After washing, tissue was stained with fresh 0.2mM b-NADPH and 0.2 mM nitroblue tetrazolium (NBT) for 1-3 hours.

### **Supplemental References:**

- S1. *Drosophila melanogaster* Recombination Rate Calculator [Internet]. Stanford University (USA): Fiston-Lavier, A., and Petrov, D.; c2007 [modified 2008 September; cited 2009 December]. Available at [http://petrov.stanford.edu/cgi-bin/recombination-rates\\_updateR5.pl](http://petrov.stanford.edu/cgi-bin/recombination-rates_updateR5.pl)
- S2. Ott, S., and Elphick, M. (2003). New Techniques for Whole-mount NADPH-diaphorase Histochemistry Demonstrated in Insect Ganglia. *J. Histochem. Cytochem.* 51, 523-532.
